# Supplementary material for: Single-cell analysis of CD4+ T-cell differentiation reveals three major cell states and progressive acceleration of proliferation
Source: PubMed Central journal article supplement (PMC4866375; doi:10.1186/s13059-016-0957-5), 2016-05-12

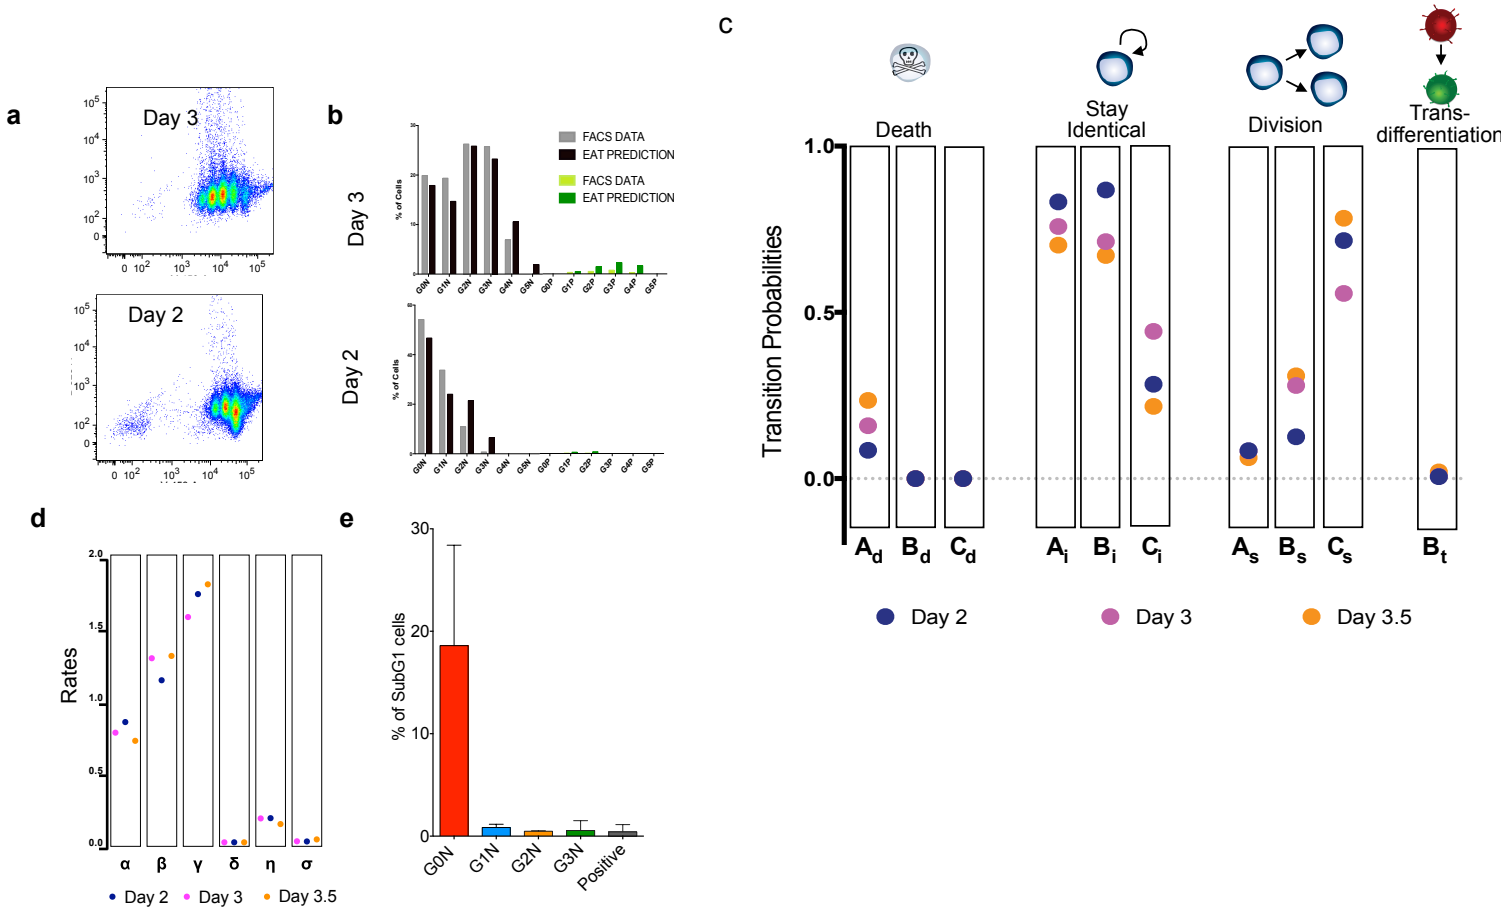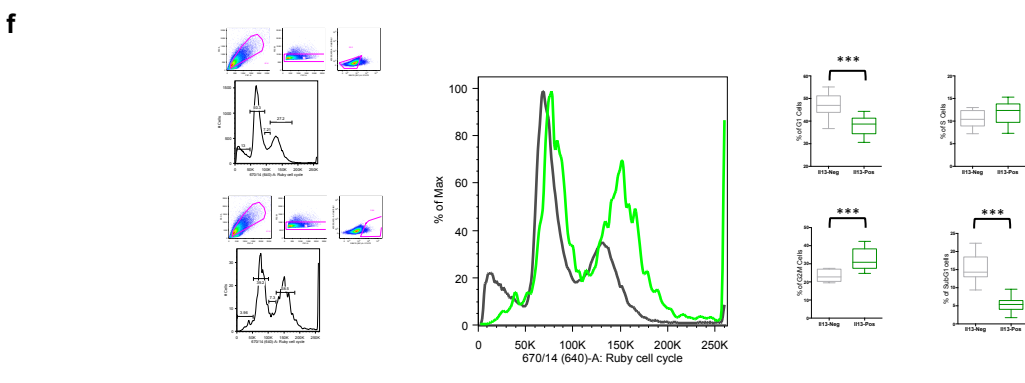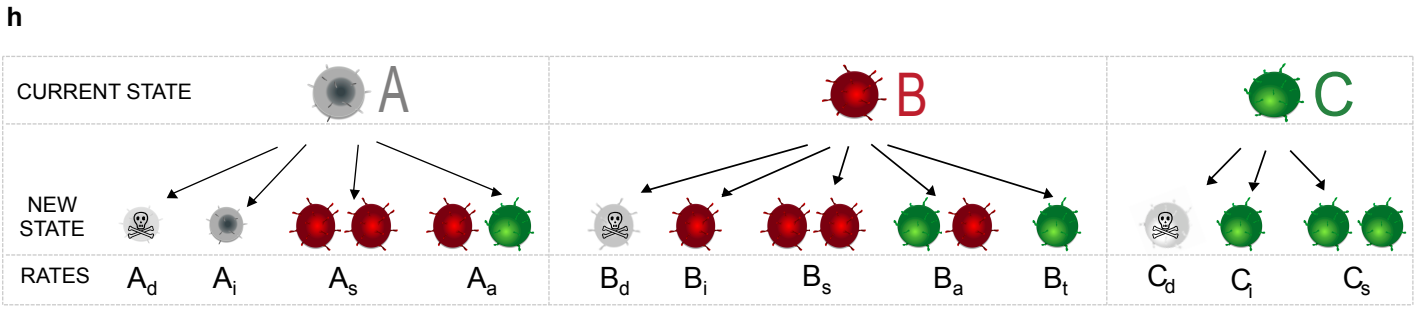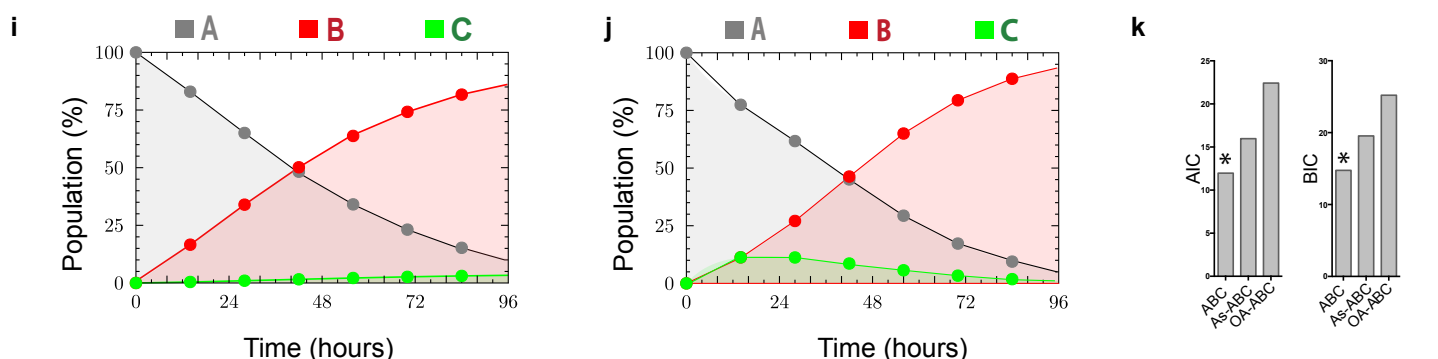

Supplement: 13059_2016_957_MOESM6_ESM.pdf [file 13059_2016_957_MOESM6_ESM.pdf]
